# Supplementary material for: Association between Serum Levels of Interleukin-25/Thymic Stromal Lymphopoietin and the Risk of Exacerbation of Chronic Obstructive Pulmonary Disease
Source: MDPI journal article supplement (doi:10.3390/biom13030564), 2023-03-20
Supplement: s1 [file s1]

## Supplementary Material

Table S1. Differences in clinical characteristics according to the breakdown of IL-25 and TSLP values

|                          | Both low<br>(n=113) | IL-25 low & TSLP high<br>(n=99) | IL-25 high & TSLP low<br>(n=150) | Both high<br>(n=200) | P-value |
|--------------------------|---------------------|---------------------------------|----------------------------------|----------------------|---------|
| Age                      | 67.5±7.6            | 68.1±7.1                        | 69.5±7.9                         | 69.3±7.6             | 0.109   |
| Sex (male)               | 110 (97.3%)         | 93 (93.9%)                      | 146 (97.3%)                      | 195 (97.5%)          | 0.365   |
| Smoking history          |                     |                                 |                                  |                      | 0.081   |
| - Former smoker          | 69 (61.1%)          | 69 (69.7%)                      | 112 (74.7%)                      | 146 (73.0%)          |         |
| - Current smoker         | 44 (38.9%)          | 30 (30.3%)                      | 38 (25.3%)                       | 54 (27.0%)           |         |
| BMI (kg/m <sup>2</sup> ) | 23.6±3.4            | 23.3±3.0                        | 22.9±3.2                         | 23.0±3.2             | 0.287   |
| mMRC score               |                     |                                 |                                  |                      |         |
| SGRQ score               | 33.4±20.1           | 29.0±17.9                       | 32.6±19.3                        | 27.6±17.3            | 0.017   |
| CAT score                | 14.1±8.2            | 14.3±7.7                        | 14.7±7.8                         | 13.2±7.9             | 0.326   |
| 6MWT (m)                 | 417.7±110.7         | 428.1±100.9                     | 387.6±93.7                       | 410.8±114.9          | 0.039   |
| Hx of asthma             | 22 (20.0%)          | 27 (28.1%)                      | 34 (22.8%)                       | 48 (24.1%)           | 0.581   |

|                                            |             |             |             |             |       |
|--------------------------------------------|-------------|-------------|-------------|-------------|-------|
| Physician diagnosed ACO                    | 27 (27.0%)  | 16 (19.3%)  | 21 (18.1%)  | 33 (20.2%)  | 0.398 |
| FEV1 (L)                                   | 1.9±0.6     | 2.0±0.6     | 1.8±0.6     | 1.9±0.6     | 0.399 |
| FEV1 (%)                                   | 65.6±18.7   | 65.5±17.6   | 63.2±20.3   | 65.6±18.1   | 0.626 |
| FVC (L)                                    | 3.5±0.7     | 3.6±0.8     | 3.5±0.8     | 3.6±0.7     | 0.825 |
| FVC (%)                                    | 84.7±14.2   | 86.4±16.3   | 85.2±16.4   | 85.6±14.1   | 0.859 |
| FEV1/FVC                                   | 53.3±11.4   | 54.0±11.4   | 50.2±12.0   | 52.7±11.2   | 0.043 |
| DLco (mL/mmHg/min)                         | 67.0±17.3   | 68.5±19.0   | 63.5±19.3   | 62.8±17.8   | 0.052 |
| Blood eosinophil count (/mm <sup>3</sup> ) | 209.6±166.4 | 266.7±367.8 | 203.7±182.3 | 234.7±262.7 | 0.239 |
| IgE (mg/dl)                                | 232.9±285.6 | 187.9±229.4 | 213.0±238.9 | 222.9±238.0 | 0.692 |
| FeNO (ppb)                                 | 25.4±17.6   | 29.3±16.4   | 26.9±15.2   | 27.0±18.7   | 0.902 |
| Hx of exacerbation                         | 13 (11.7%)  | 14 (14.3%)  | 15 (10.2%)  | 29 (14.9%)  | 0.586 |
| IL-25 (ng/ml)                              | 1.2±0.1     | 1.5±0.1     | 1.2±0.1     | 1.5±0.6     | <0.01 |

|              |         |         |         |         |       |
|--------------|---------|---------|---------|---------|-------|
| TSLP (pg/ml) | 0.4±0.2 | 0.5±0.2 | 1.0±0.3 | 1.1±1.0 | <0.01 |
|--------------|---------|---------|---------|---------|-------|

Table S2. Risk of moderate-to-severe exacerbations between IL-25 high/TSLP high and both low group.

|                                      | Moderate-to-severe exacerbation |           |         |
|--------------------------------------|---------------------------------|-----------|---------|
|                                      | OR                              | 95%CI     | p-value |
| IL-25 high & TSLP high (vs both low) | 0.90                            | 0.77-1.06 | 0.21    |
